# Supplementary material
Source: HighWire-hosted journal article supplement (https://bmjopen.bmj.com/content/7/6/e015515)
Supplement: inline-supplementary-material-4 [file inline-supplementary-material-4.pdf]

# Supplementary File 4: ICL time spent by activity by hours

| Activity                     | NH1 hours (%) | NH2 hours (%) | Hours not attributable to a NH (%) | Total hours (%) | Total Costs* |
|------------------------------|---------------|---------------|------------------------------------|-----------------|--------------|
| <b>Assessing needs</b>       |               |               |                                    |                 |              |
| Assessing needs**            | 122.75 (44)   | 87.75 (40)    | NA                                 | 210.5 (32)      | £6,241       |
| Meeting family               | 9.75 (3)      | 14 (6)        | NA                                 | 23.75 (4)       | £665         |
| Meeting staff                | 21.75 (8)     | 16.25 (7)     | NA                                 | 38 (6)          | £1,064       |
| Emails/phone calls^          | 24 (9)        | 14.25 (6)     | 5.75 (4)                           | 44 (7)          | £869#        |
| <b>Core meetings</b>         | 10.25 (4)     | 5.75 (3)      | NA                                 | 16 (3)          | £448         |
| <b>Wider Meetings</b>        | 7.5 (3)       | NA            | NA                                 | 7.5 (1)         | £210         |
| <b>Staff training</b>        |               |               |                                    |                 |              |
| Preparing training           | 19 (7)        | 34.25 (16)    | 26.75 (17)                         | 80 (12)         | £1,753       |
| Providing training           | 14.25 (5)     | 19.25 (9)     | NA                                 | 33.5 (5)        | £1,019       |
| <b>Other</b>                 |               |               |                                    |                 |              |
| Travel                       | 47.25 (17)    | 29.75 (13)    | 30 (19)                            | 107 (16)        | £4,053***    |
| ICL professional development | NA            | NA            | 67 (42)                            | 67 (10)         | £1,468       |
| ICL clinical supervision     | NA            | NA            | 28.75 (18)                         | 28.75 (4)       | £463         |
| Total                        | 276.5 (100)   | 221.25 (100)  | 158.25 (100)                       | 656 (100)       | £18,255      |

\*Source for hourly rate: Department of Health and Health Education England, includes on-costs

\*\*Includes unproductive time in the NH such as waiting to speak to staff, trying to locate staff or records etc.

\*\*\*Includes cost of train fare

#excludes cost of telephone calls

^includes time speaking with or sending emails to family members

NA = not applicable
